# Supplementary material for: Parametrization consequences of constraining soil organic matter models by total carbon and radiocarbon using long-term field data
Source: Copernicus journal article supplement (doi:10.5194/bg-2015-630), 2016-01-18

**S1: Effect of the weighting parameter on the variance defining the probability distribution of the two data streams.**

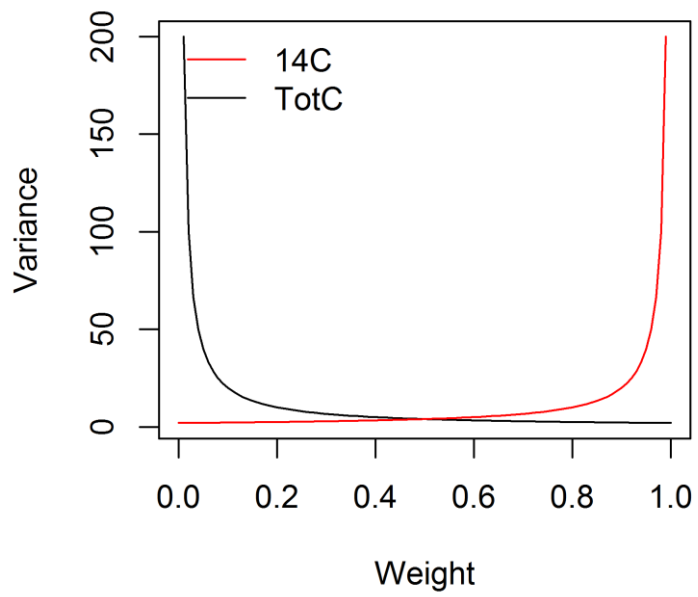

**S2: Coefficient of variation of all the parameters (average) among all the three treatments for the five model structures with the variation of the relative weight of  $SO^{14}C$  over total C. In this scale 1 means only total C, 0 means only  $SO^{14}C$ .**

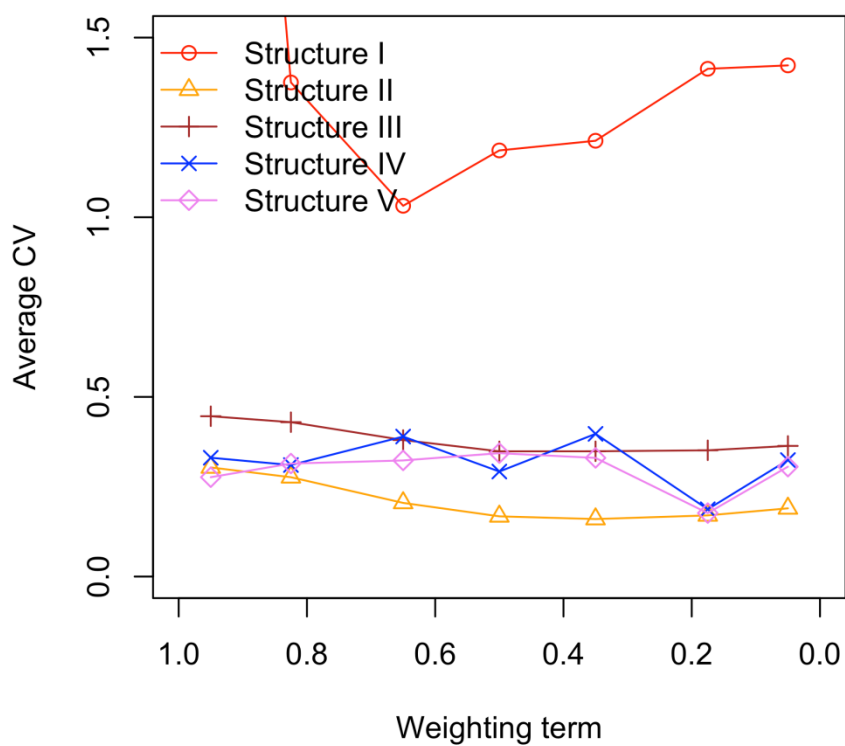

**S3: Value (dimensionless) took by the climatic parameter  $r$  (Eq. (9)) over the simulation. The shaded area represents the parameter uncertainty.**

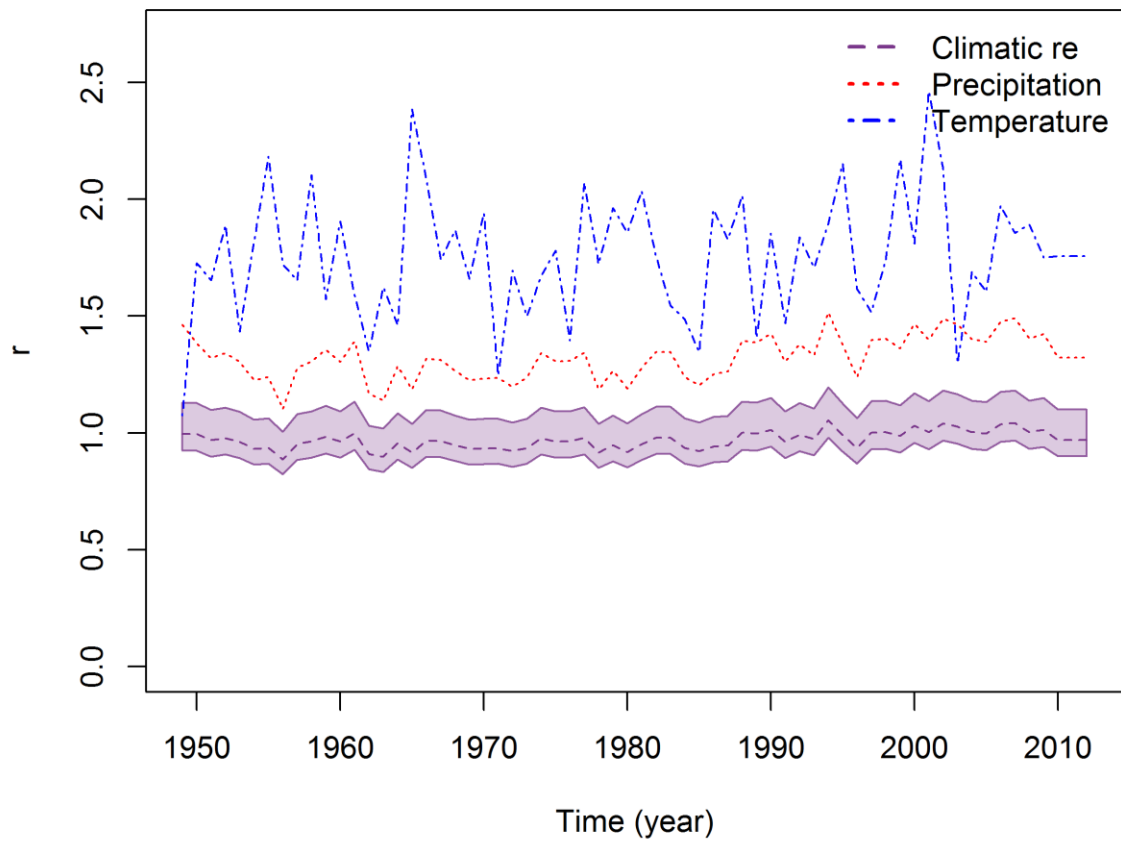

**S4: The posterior probability density (vertical axis) for the input error term (dimensionless, horizontal axis) for model structure I (A), II (B), II, (C), IV (D) and V (E).**

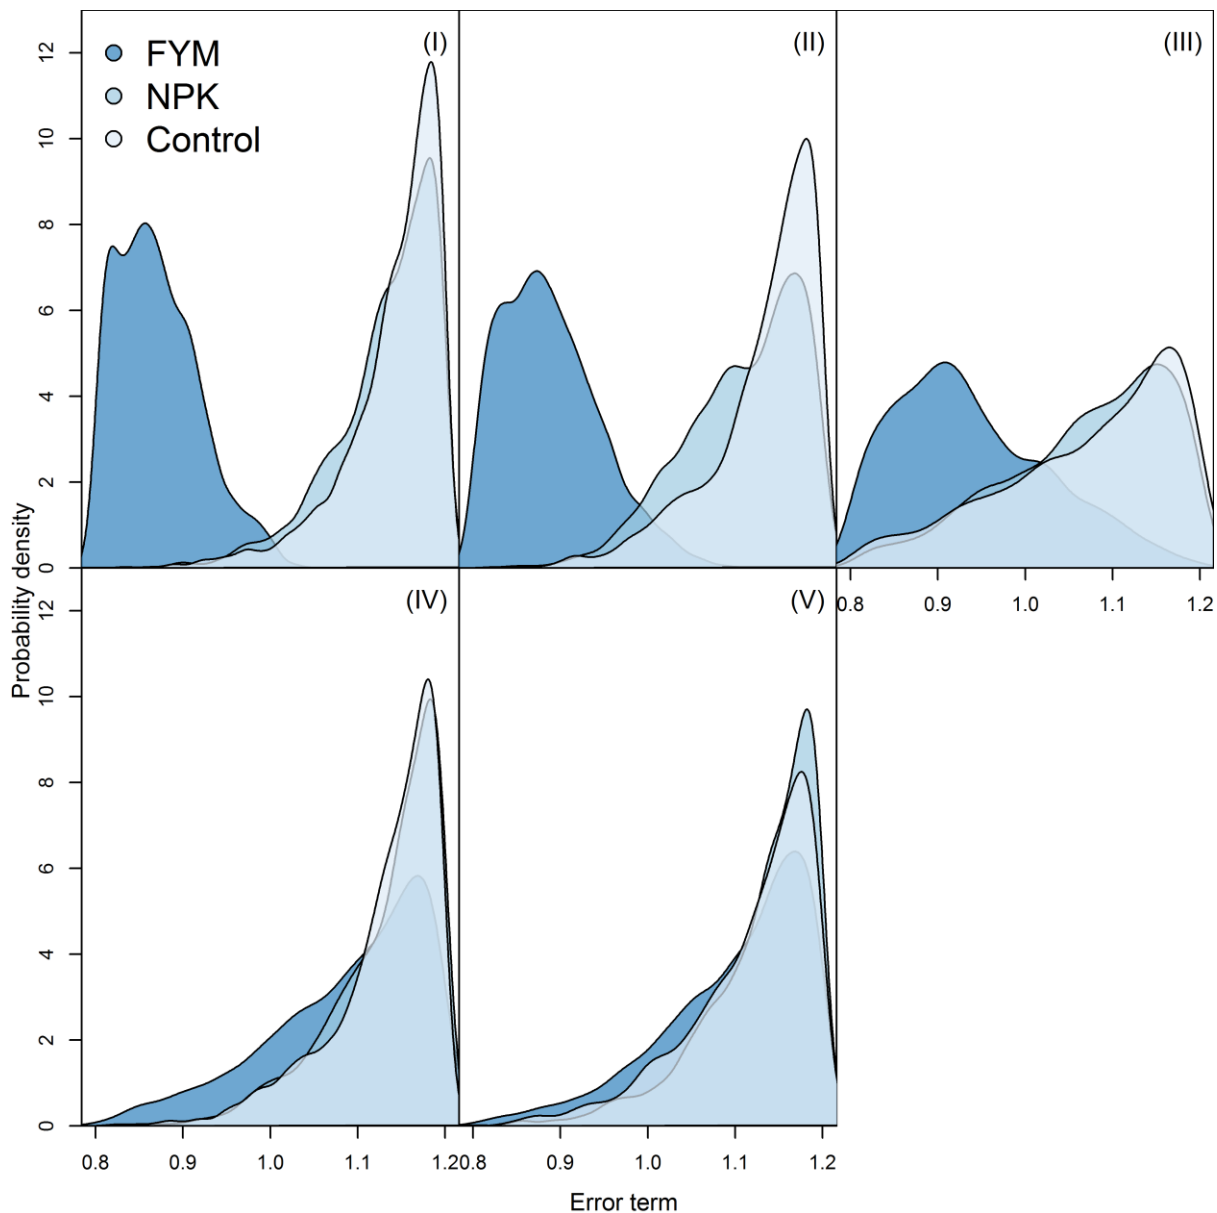

**S5: Simulation of SOC pools in the ZOFE trial as described by model structure III, with weighting factor = 0.35. Error bars represent the measured (black) and estimated (dark grey) standard error of the measurements. SOC (A,C,E) is in  $\text{Mg ha}^{-1}$ , while  $\text{SO}^{14}\text{C}$  (B, D, F) is in pMC.**

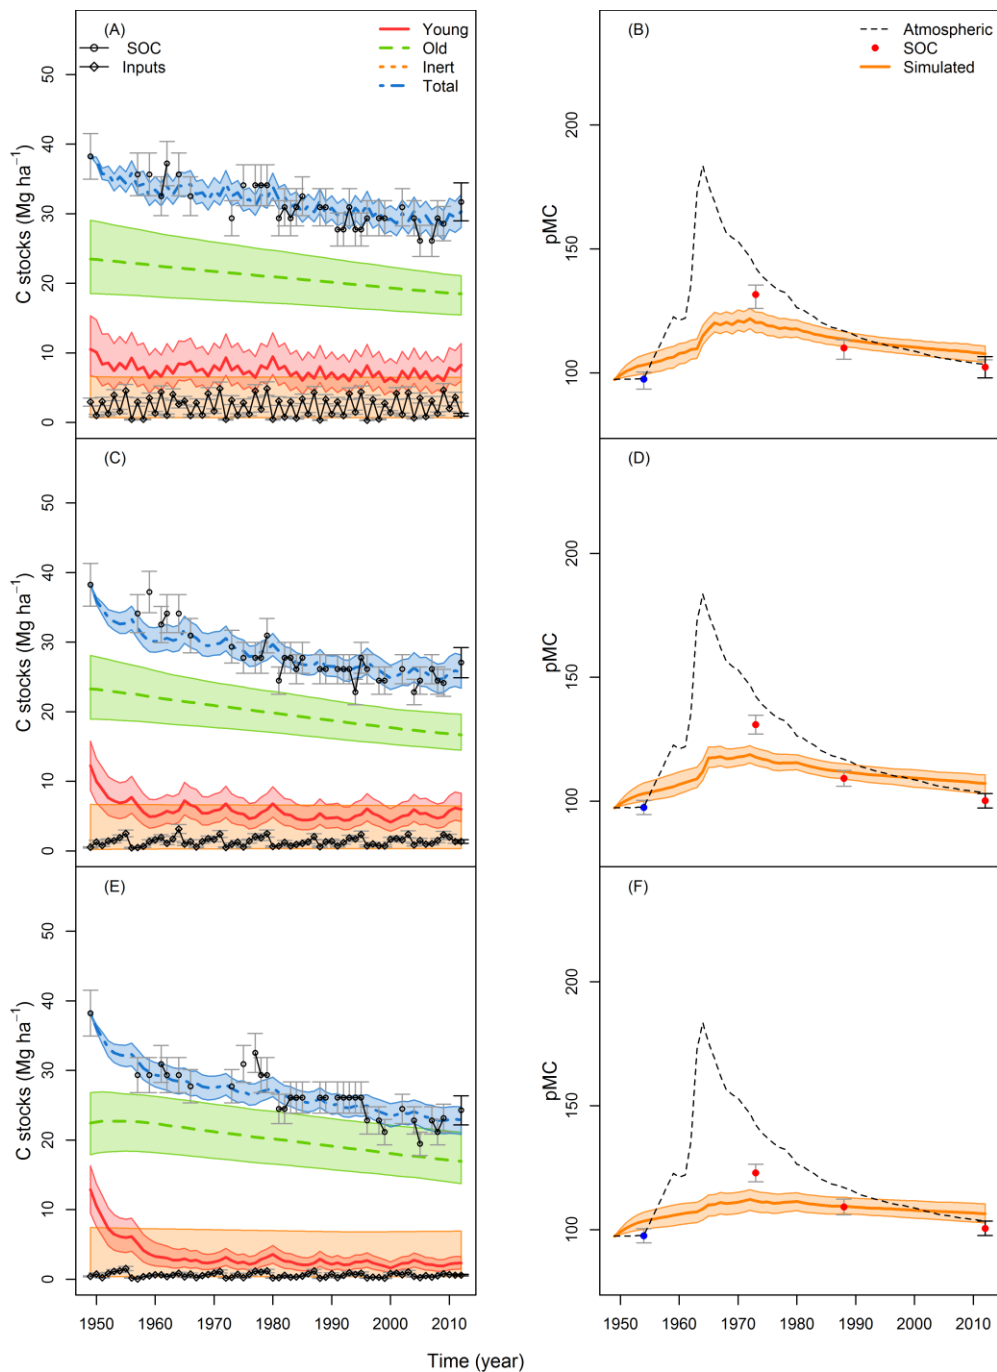

**S6: Simulation of SOC pools in the ZOFE trial as described by model structure IV, with weighting factor = 0.35. Error bars represent the measured (black) and estimated (dark grey) standard error of the measurements. SOC (A,C,E) is in  $\text{Mg ha}^{-1}$ , while  $\text{SO}^{14}\text{C}$  (B, D, F) is in pMC.**

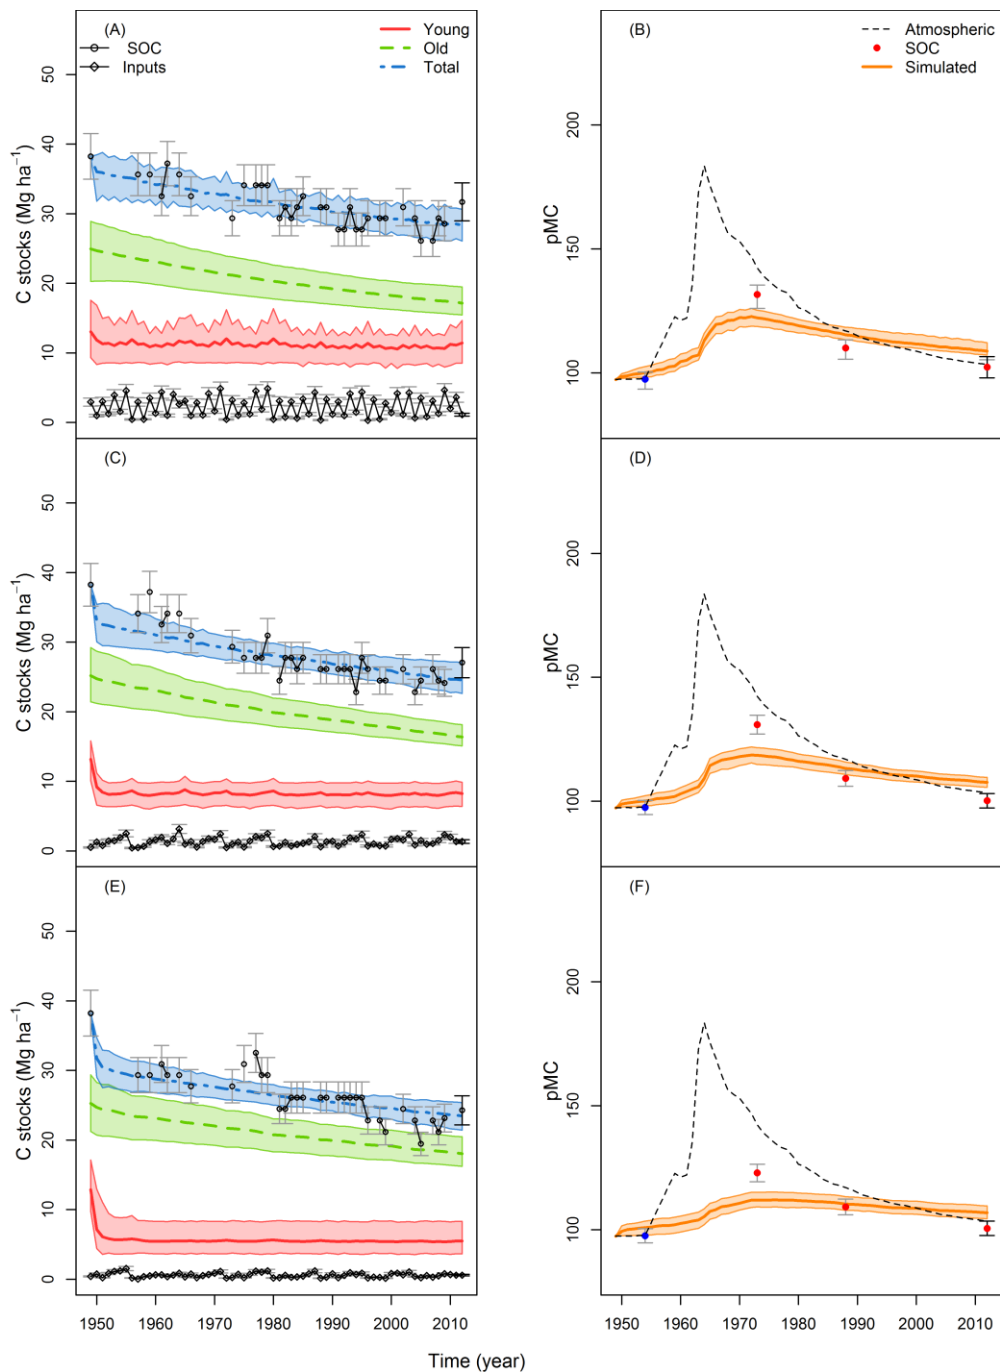

**S7: Simulation of SOC pools in the ZOFE trial as described by model structure V, with weighting factor = 0.35. Error bars represent the measured (black) and estimated (dark grey) standard error of the measurements. SOC (A,C,E) is in  $\text{Mg ha}^{-1}$ , while  $\text{SO}^{14}\text{C}$  (B, D, F) is in pMC.**

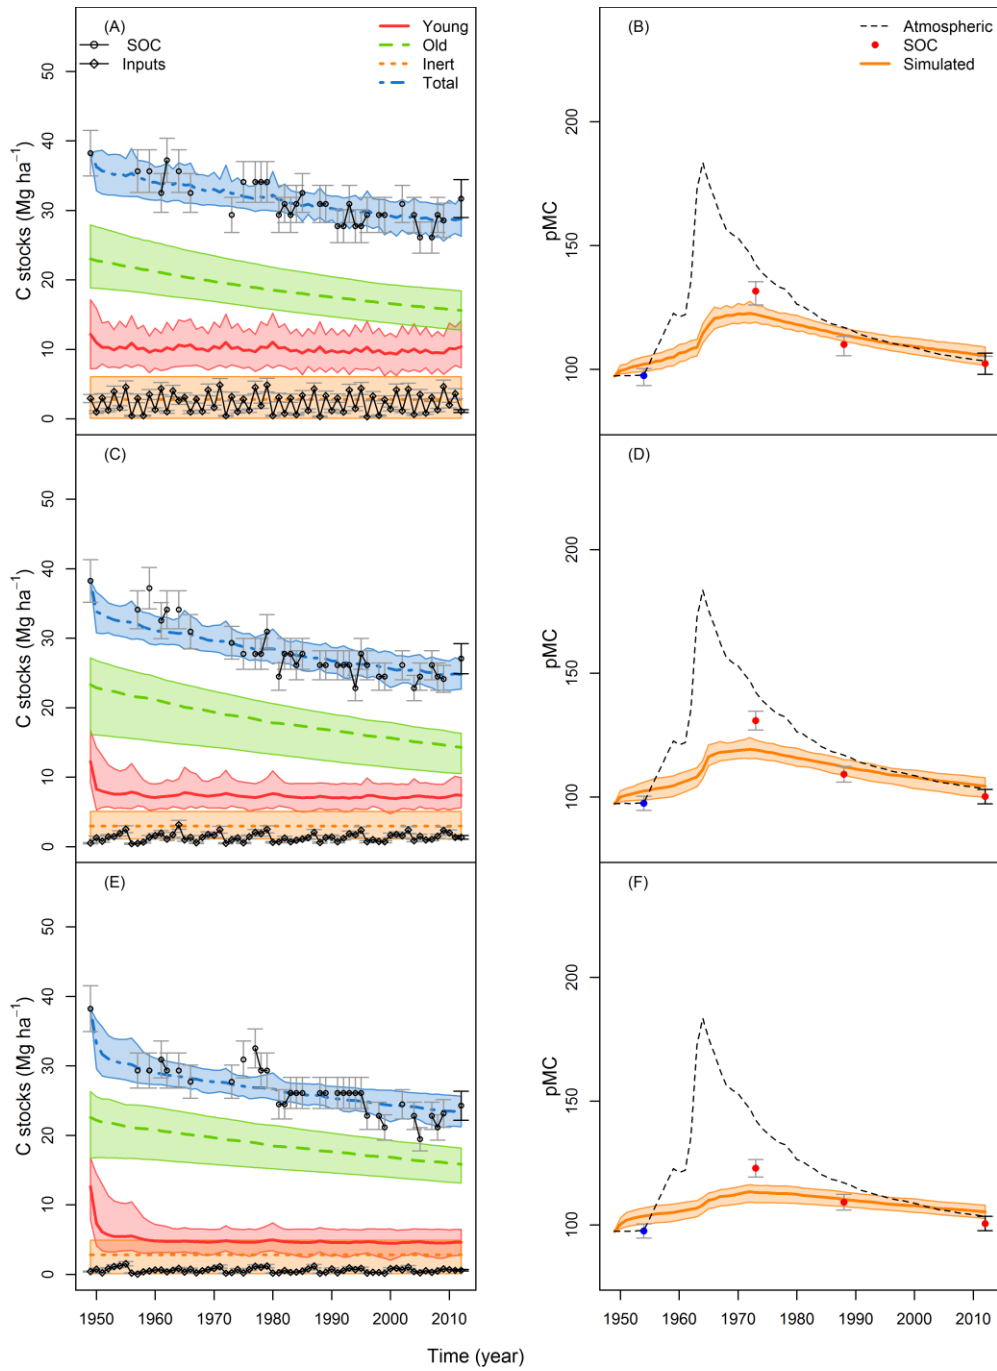

**S8: Graphical abstract of model structure I**

Model  
Structure I

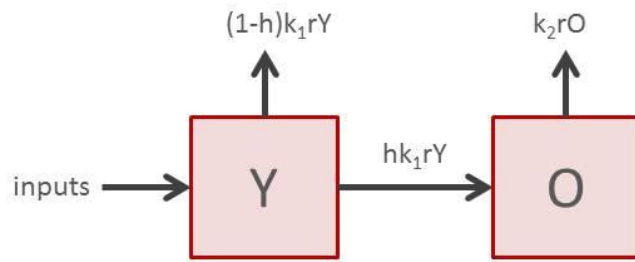



S9: Graphical abstract of model structure II

Model  
Structure II

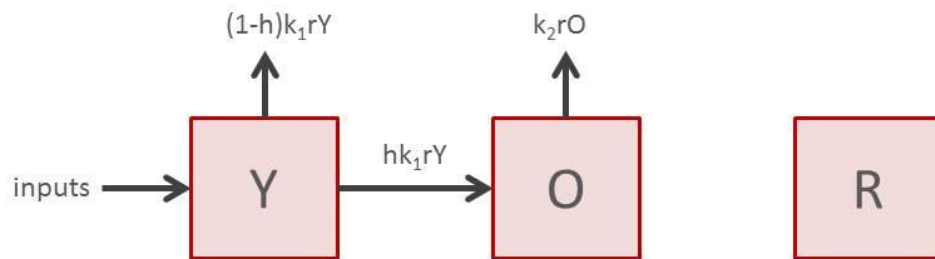

**S10: Graphical abstract of model structure III**

**Model  
Structure III**

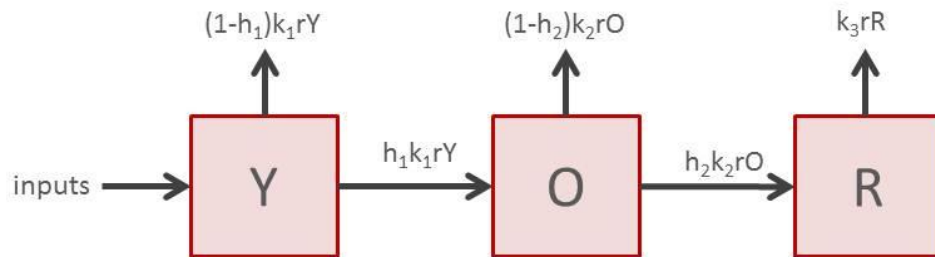

**S11: Graphical abstract of model structure IV**

## Model Structure IV

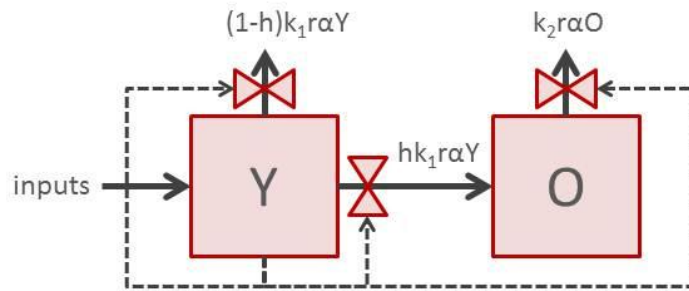

S12: Graphical abstract of model structure V

Model Structure IV

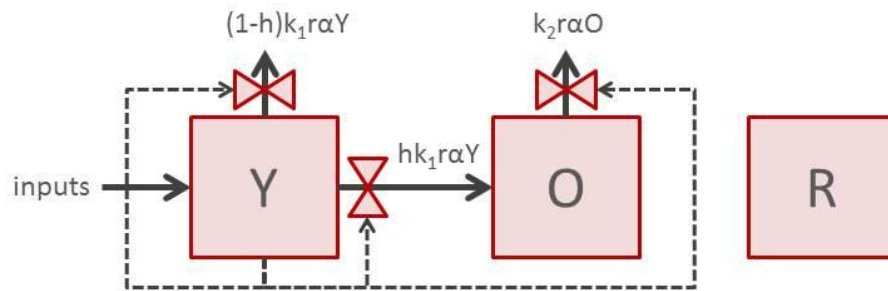

Supplement: Supplementary file 1 [file bg-2015-630-supplement.pdf]
